# Supplementary material for: Comparison of Broth Microdilution, Disk Diffusion and Strip Test Methods for Cefiderocol Antimicrobial Susceptibility Testing on KPC-Producing Klebsiella pneumoniae
Source: MDPI journal article supplement (doi:10.3390/antibiotics12030614), 2023-03-20

The figure consists of two vertically stacked box plots. The top plot displays the MIC of cefiderocol (mg/L) for KPC-3 and KPC-mutated strains. The y-axis is logarithmic, ranging from 1 to 64, with a dotted horizontal line at 2. The KPC-3 group (black dots) has a median MIC of 8 mg/L, with values ranging from 4 to 16 mg/L. The KPC-mutated group (open circles) has a median MIC of 32 mg/L, with values ranging from 4 to 32 mg/L. The bottom plot displays the MIC of ceftazidime-avibactam (mg/L) for the same two groups. The y-axis is logarithmic, ranging from 1 to 512, with a dotted horizontal line at 8. The KPC-3 group (black dots) has a median MIC of 8 mg/L, with values ranging from 2 to 8 mg/L. The KPC-mutated group (open circles) has a median MIC of 256 mg/L, with values ranging from 8 to 256 mg/L.

| Strain Type | Drug                  | Median MIC (mg/L) | Q1 (mg/L) | Q3 (mg/L) | Min (mg/L) | Max (mg/L) |
|-------------|-----------------------|-------------------|-----------|-----------|------------|------------|
| KPC-3       | Cefiderocol           | 8                 | 4         | 10        | 4          | 16         |
| KPC-mutated | Cefiderocol           | 32                | 8         | 32        | 4          | 32         |
| KPC-3       | Ceftazidime-avibactam | 8                 | 4         | 8         | 2          | 8          |
| KPC-mutated | Ceftazidime-avibactam | 256               | 64        | 256       | 8          | 256        |

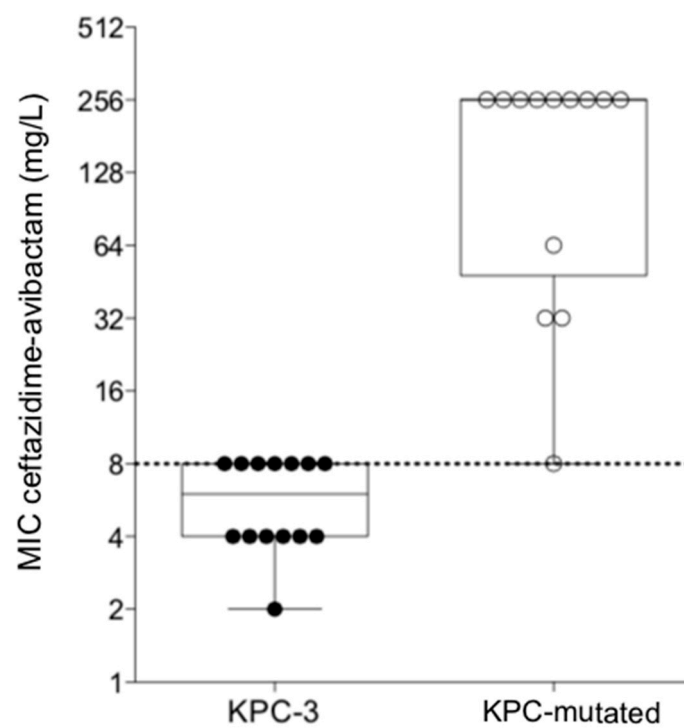

Supplement: s1 [file s1]
